# Supplementary material for: Size-dependent hygroscopicity of levoglucosan and D-glucose aerosol nanoparticles
Source: Copernicus journal article supplement (doi:10.5194/acp-23-4763-2023), 2023-04-21
Supplement: Supplementary file 1 [file acp-23-4763-2023-supplement.pdf]

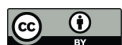

*Supplement of*

## **Size-dependent hygroscopicity of levoglucosan and D-glucose aerosol nanoparticles**

**Ting Lei et al.**

*Correspondence to:* Yafang Cheng (yafang.cheng@mpic.de)

The copyright of individual parts of the supplement might differ from the article licence.

## Table

**Table S1.** Substances and their physical properties used in this work.

| Chemical compound | Chemical formula                              | Molar mass [g mol <sup>-1</sup> ] | Density [g cm <sup>-3</sup> ] | Solubility mol/kg        | Solution surface tension [J m <sup>-2</sup> ] | Manufacture           |
|-------------------|-----------------------------------------------|-----------------------------------|-------------------------------|--------------------------|-----------------------------------------------|-----------------------|
| Levoglucozan      | C <sub>6</sub> H <sub>10</sub> O <sub>5</sub> | 162.141                           | 1.69                          | 8.23 <sup>a</sup> (20°C) | 0.073 <sup>b</sup>                            | Sigma-Aldrich, 99.99% |
| D-glucose         | C <sub>6</sub> H <sub>12</sub> O <sub>6</sub> | 180.16                            | 1.562                         | 5.69 <sup>c</sup>        | 0.072                                         | Sigma-Aldrich, 99.99% |

<sup>a</sup>Zamora et al (2011)

<sup>b</sup>Tuckermann and Cammenga (2004)

<sup>c</sup>Ruegg and Blanc (1981)

**Table S2.** Coefficients (a, b, c) of the fitted growth curve parameterization to measured growth factor data using Eq. (3). Measured growth factors of initial dry diameter used in Eq. (1) were firstly corrected for the Kelvin effect.

| Chemical compounds | <i>a</i> | <i>b</i> | <i>c</i> |
|--------------------|----------|----------|----------|
| Levoglucozan       | 0.45602  | -0.69869 | 0.44755  |
| D-glucose          | 0.30189  | -0.38796 | 0.30478  |

**Table S3.** Equations for KD fit water activity  $a_w$  of levoglucozan and D-glucose at 298K, respectively. Here  $x$  is the molality (mol kg<sup>-1</sup>)

| Chemical compounds | Equations                                                                                   |
|--------------------|---------------------------------------------------------------------------------------------|
| Levoglucozan       | $y = 1.97 * 10^{-9} * x^4 - 7.923 * 10^{-7} * x^3 + 0.0001469 * x^2 - 0.01649 * x + 0.9931$ |
| D-glucose          | $y = \frac{0.472*x^2+4.065*10^4*x+9.655}{x^3+884.4*x^2+4.063*10^4*x-0.5678}$                |

**Table S4.** Calculation of the ratio of gas-phase concentration to the total concentration for levoglucosan nanoparticles in the different sizes.

| Levoglucosan diameter (nm) | The ratio of gas-phase concentration to the total concentration <sup>a</sup> |
|----------------------------|------------------------------------------------------------------------------|
| 100                        | 0.000811                                                                     |
| 60                         | 0.000833097                                                                  |
| 20                         | 0.023217028                                                                  |
| 15                         | 0.177992638                                                                  |
| 10                         | 0.328220471                                                                  |

<sup>a</sup>See S1 section below

Figure

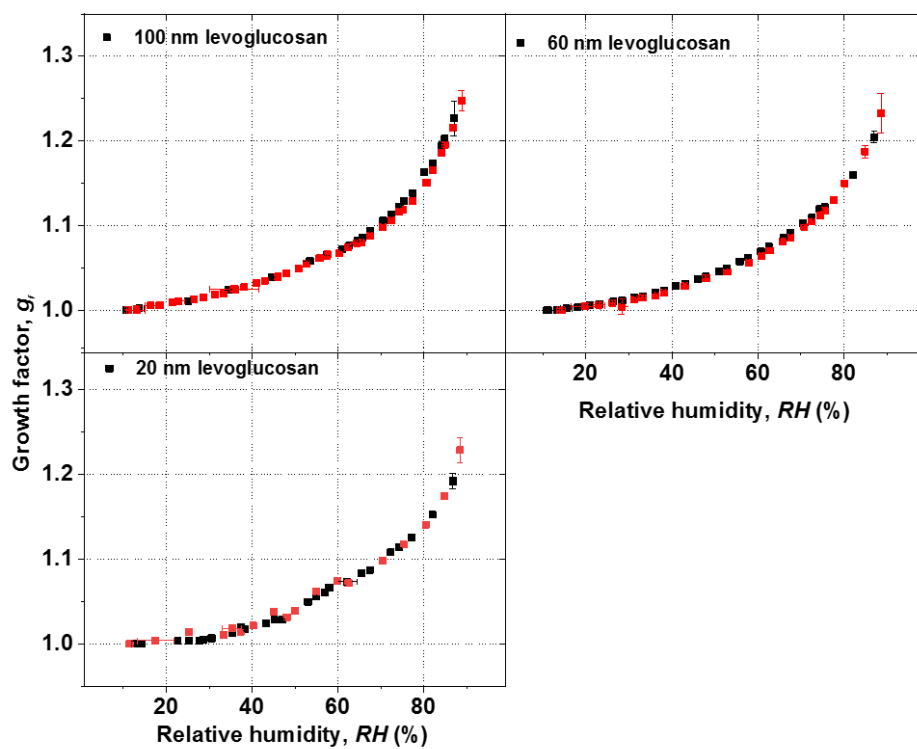

**Figure S1.** Mobility-diameter hygroscopic growth factors ( $g_r$ ) of levoglucosan aerosol nanoparticles with dry mobility diameter from 20 to 100 nm in the deliquescence mode (black square and error bar) and the efflorescence mode (red square and error bar).

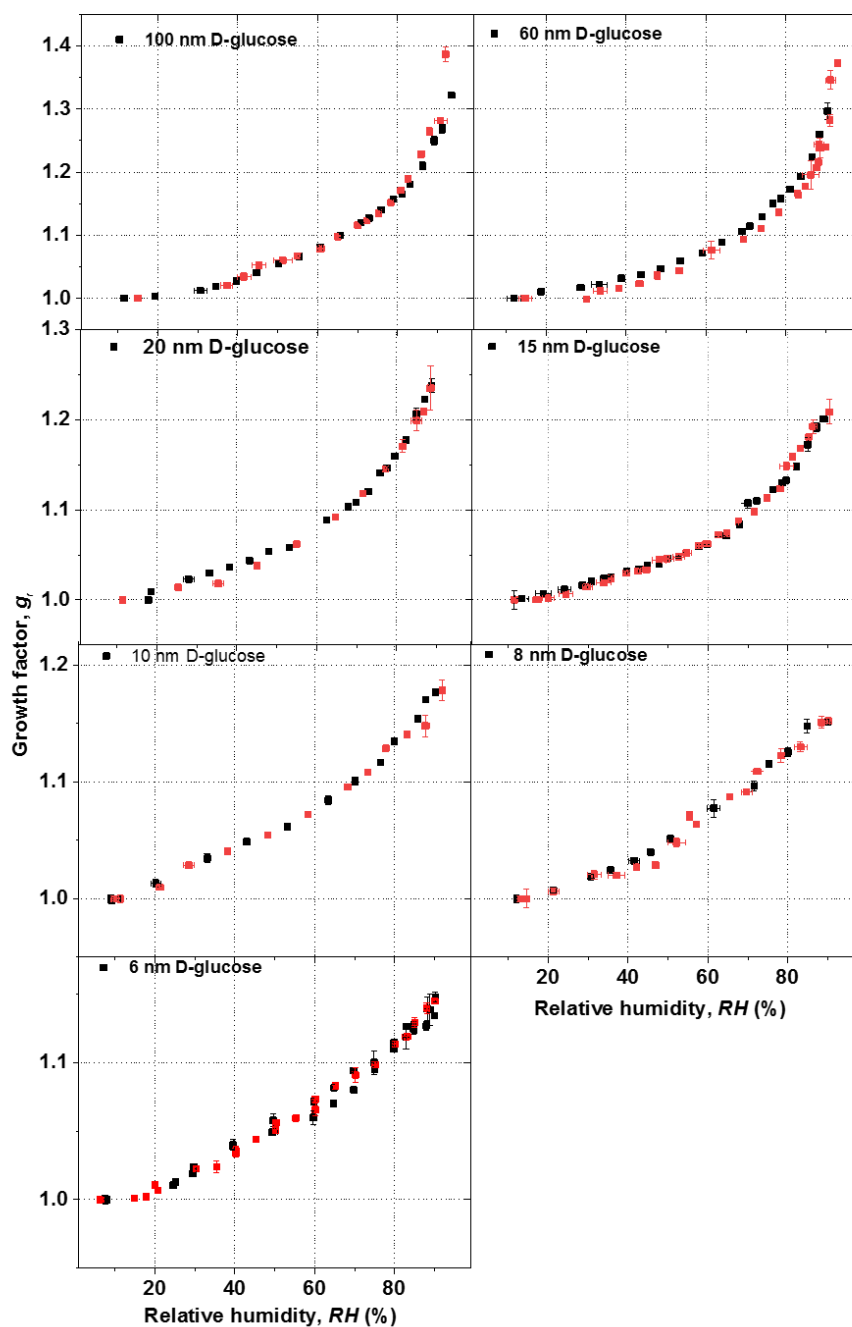

**Figure S2.** Mobility-diameter hygroscopic growth factors ( $g$ ) of D-glucose aerosol nanoparticles with dry mobility diameter from 6 to 100 nm in the deliquescence mode (black square and error bar) and the efflorescence mode (red square and error bar).

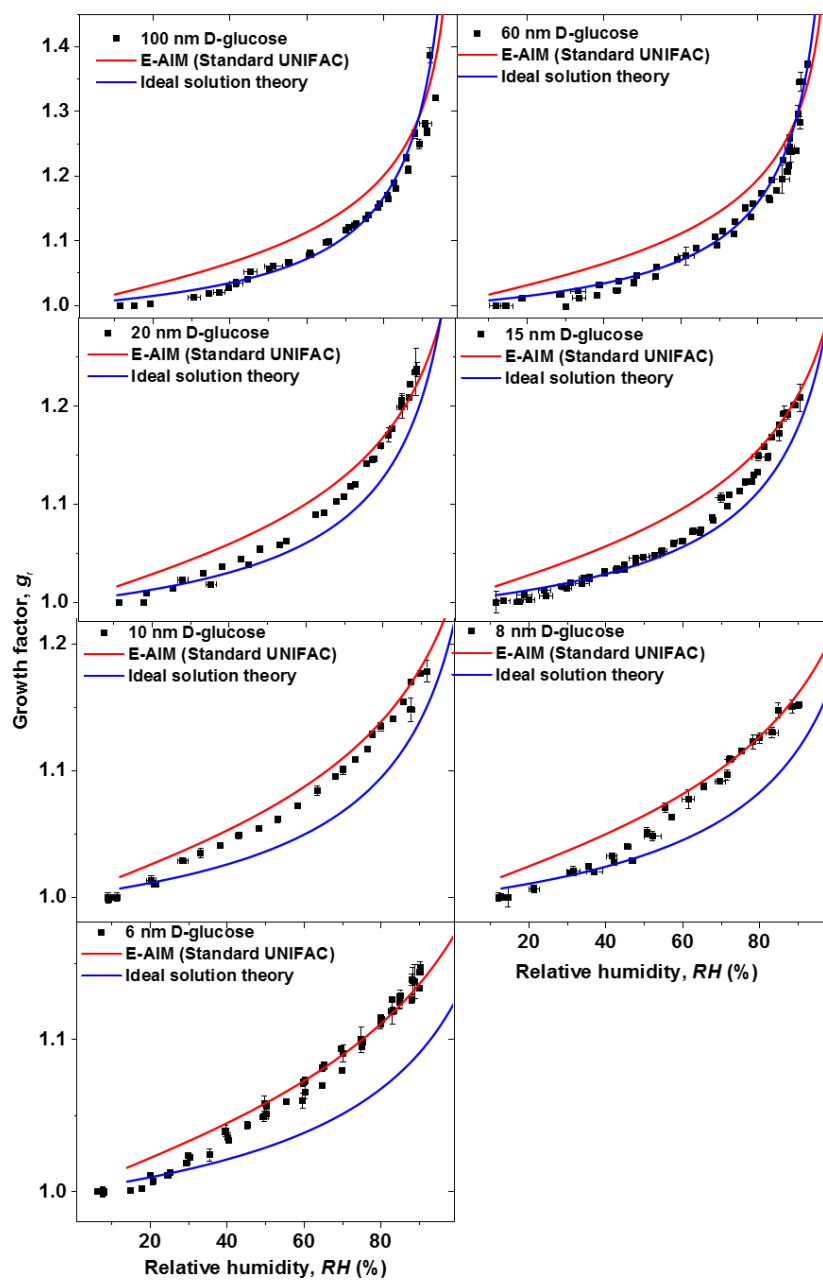

**Figure S3.** Mobility-diameter hygroscopic growth factors ( $g_r$ , black squares) of D-glucose aerosol nanoparticles with dry mobility diameter from 100 down to 6 nm in both deliquescence and efflorescence modes. In comparison, E-AIM (Standard UNIFAC) (red line) and Ideal solution theory (blue line) predict growth factors of D-glucose aerosol nanoparticles.

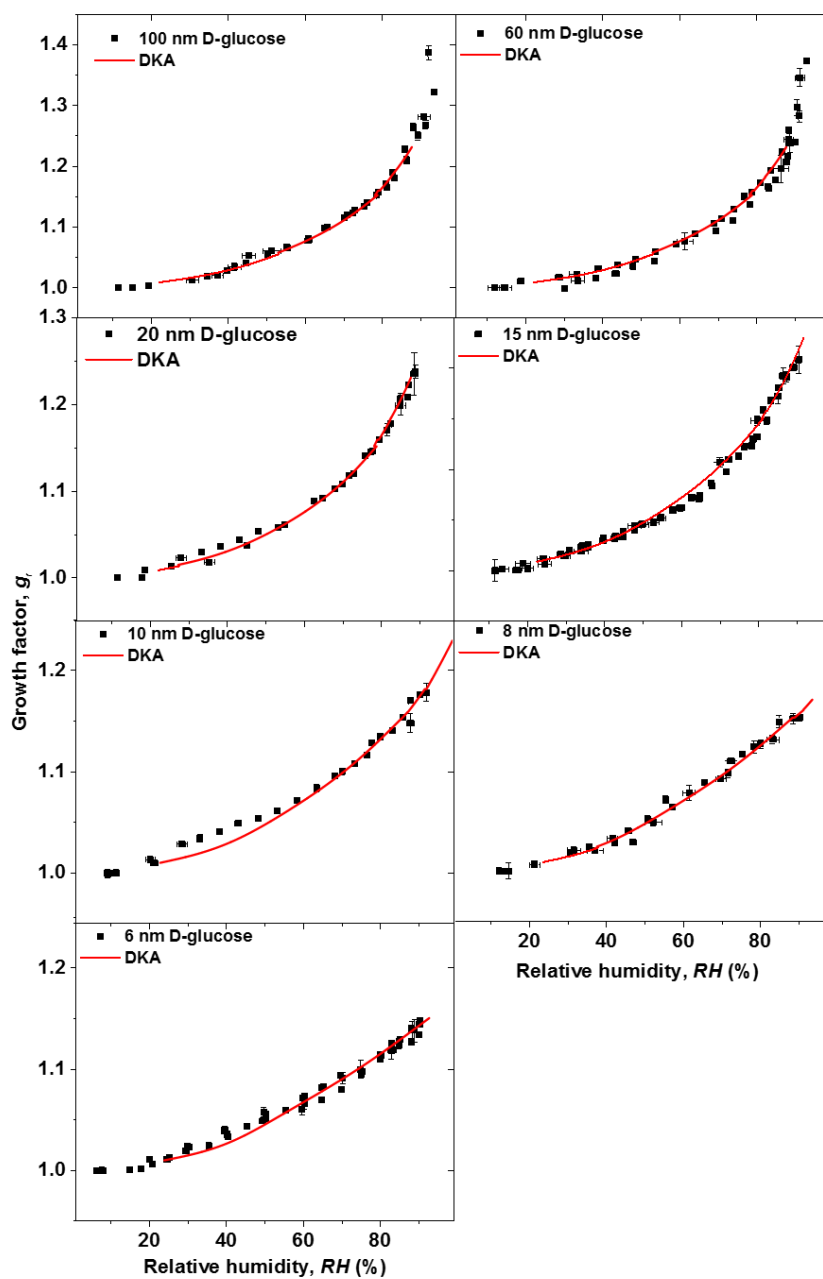

**Figure S4.** Mobility-diameter hygroscopic growth factors ( $g_f$ , black squares) of D-glucose aerosol nanoparticles with dry mobility diameter from 100 down to 6 nm in both deliquescence and efflorescence modes. In comparison, DKA model (red line) predict growth factors of D-glucose aerosol nanoparticles.



## S1. Calculation of ratio of gas-phase concentration to the total concentration

### S1.1 Calculation of gas-phase concentration (g/cm<sup>3</sup>)

$$P_A = P_A^0 \exp\left(\frac{2\sigma M}{RT\rho_l R_p}\right) \quad (\text{S1})$$

$$m_{gas} = \frac{PVM}{RT} \quad (\text{S2})$$

where  $P_A$  and  $P_A^0$  are vapor pressure, equilibrium vapor pressure, respectively.  $\sigma$ ,  $M$ ,  $\rho_l$ , and  $R_p$  mean surface tension, molecular weight of the substance, liquid-phase density, and a droplet of radius, respectively. This equation (Eq. 8) shows a relationship between mass in gas phase ( $m_{gas}$ ) and pressure ( $P$ ), volume ( $V$ ), mole mass ( $M$ ), the ideal gas constant ( $R$ ), and temperature. Here, Vapor pressure ( $P$ ) is equal to saturated ratio of levoglucosan vapor multiplied saturated levoglucosan vapor pressure at 293.15 K.

### S1.2 Calculation of total concentration of generated particles (g/cm<sup>3</sup>)

$$m_{total} = \frac{dN}{d\log D_p} \times d\log D_p \times \frac{\pi}{6} D_p^3 \times \rho \quad (\text{S3})$$

where  $dN$  is particle concentration,  $D_p$  is the particle diameter, and  $\rho$  is the density of particles.

### S1.3 Ratio of the gas-phase concentration to the total concentration of generated particles

$$Ratio = \frac{m_{gas}}{m_{total}} \quad (\text{S4})$$
